# Supplementary material for: Empowering rural communities for effective larval source management: A small-scale field evaluation of a community-led larviciding approach to control malaria in south-eastern Tanzania
Source: PubMed Central journal article supplement (PMC11493201; doi:10.1016/j.parepi.2024.e00382), 2024-10-04

Binned residual plot

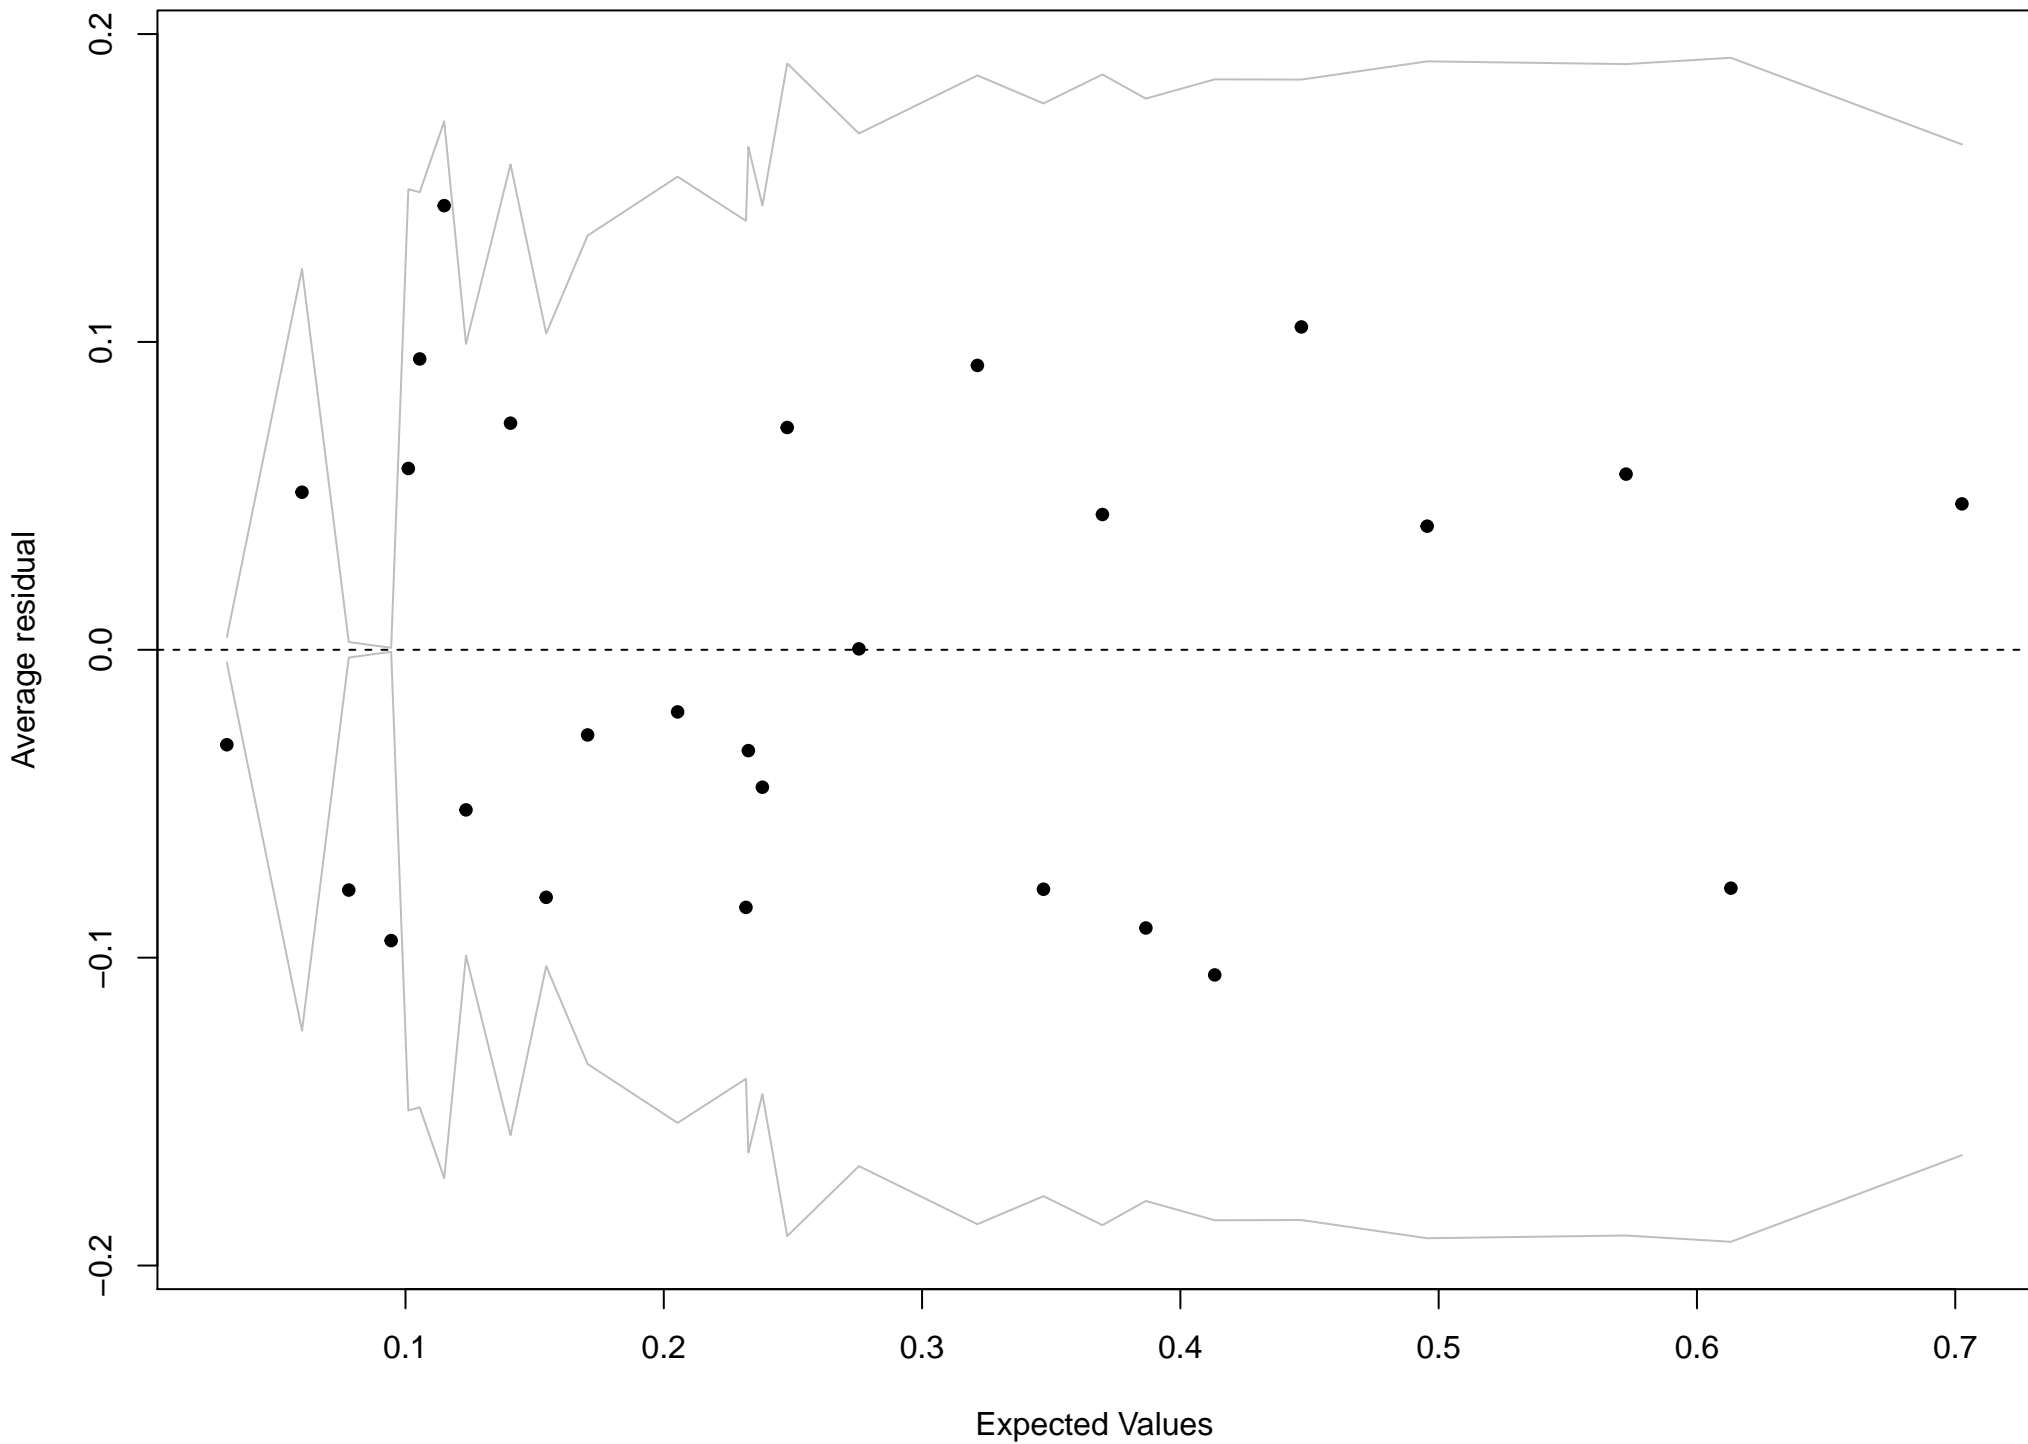

Supplement: mmc3.pdf [file mmc3.pdf]
